# 1 **Early identification of dengue virus lineage replacement in Brazil using** 2 **portable genomic surveillance**

3

4 Jaqueline Goes de Jesus<sup>1</sup>, Karina Rocha Dutra<sup>2</sup>, Flavia Cristina da Silva Salles<sup>1</sup>, Ingra

5 Morales Claro<sup>1</sup>, Ana Carolina Terzian<sup>2</sup>, Darlan da Silva Candido<sup>3</sup>, Sarah C. Hill<sup>3</sup>, Julien

6 Thézé<sup>3</sup>, Tatiana Lang D'Agostini<sup>4</sup>, Alvina Clara Felix<sup>1</sup>, Andreia F. Negri Reis<sup>5</sup>, Luiz Carlos

7 Junior Alcantara<sup>6,7</sup>, André L. Abreu<sup>8</sup>, Júlio H. R. Croda<sup>8,9,10</sup>, Wanderson K. de Oliveira<sup>8</sup>, Ana

8 Maria Bispo de Filipis<sup>6</sup>, Maria do Carmo Rodrigues dos Santos Camis<sup>4</sup>, Camila Malta

9 Romano<sup>1,11</sup>, Nick J. Loman<sup>12</sup>, Oliver G. Pybus<sup>3</sup>, Ester Cerdeira Sabino<sup>1\*</sup>, Mauricio L.

10 Nogueira<sup>2\*</sup>, Nuno Rodrigues Faria<sup>1,3\*</sup>

11

12 1. Instituto de Medicina Tropical, Universidade de São Paulo, São Paulo, Brazil.

13 2. Laboratório de Pesquisa em Virologia, Faculdade de Medicina de São José do Rio Preto,

14 São José do Rio Preto, Brasil.

15 3. Department of Zoology, University of Oxford, South Parks Road, Oxford, UK.

16 4. Centro de Vigilância Epidemiológica "Prof.Alexandre Vranjac"/ Coordenadoria de

17 Controle de Doenças/Secretaria de Estado da Saúde, São Paulo, Brazil.

18 5. Secretaria Municipal de Saúde, São José do Rio Preto, São Paulo, Brazil.

19 6. Laboratório de Flavivírus, Instituto Oswaldo Cruz, FIOCRUZ, Rio de Janeiro, Brazil.

20 7. Universidade Federal de Minas Gerais, Belo Horizonte, Brazil.

21 8. Secretaria de Vigilância em Saúde, Coordenação Geral de Laboratórios de Saúde Pública,

22 Ministério da Saúde, Brasília-DF, Brazil.

23 9. Laboratório de Pesquisa em Ciências da Saúde, Universidade Federal da Grande Dourados,

24 Dourados, Mato Grosso do Sul, Brazil.

25 10. Fundação Oswaldo Cruz Campo Grande, Mato Grosso do Sul, Brazil.

26 11. Hospital das Clínicas HCFMUSP (LIM52), Faculdade de Medicina, Universidade de São

27 Paulo, São Paulo, Brazil.

28 12. Institute of Microbiology and Infection, University of Birmingham, Birmingham, B15

29 2TT, UK.

30

31

32 **Corresponding Authors:** [sabinoec@gmail.com](mailto:sabinoec@gmail.com), [mauricio.nogueira@edu.famerp.br](mailto:mauricio.nogueira@edu.famerp.br), and

33 [nuno.faria@zoo.ox.ac.uk](mailto:nuno.faria@zoo.ox.ac.uk)

35 **Abstract**

36 Over 400 million people are estimated to be at risk of acquiring dengue virus (DENV).  
37 Despite efforts to mitigate the impact of DENV epidemics, the virus remains a public health  
38 problem in the Americas: more than one million DENV cases were reported in the continent  
39 between January and July 2019 DENV was first detected in Brazil in 1982, and Brazil has  
40 reported 88% (1,127,244 cases) of all DENV cases in the Americas during 2019 to date. São  
41 Paulo state in the southeast of Brazil has reported nearly half of all DENV infections in the  
42 country. Here we characterised the genetic diversity of DENV strains circulating in São  
43 Paulo state in 2019, at the epicentre of the ongoing DENV epidemic. Using portable  
44 nanopore sequencing we generated 20 new DENV genome sequences from viremic patients  
45 with suspected dengue infection residing in two of the most-affected municipalities,  
46 Araraquara and São José do Rio Preto. We conducted a comprehensive phylogenetic analysis  
47 with 1,630 global DENV strains to better understand the evolutionary history of the DENV  
48 lineages that currently circulate in the region. The new outbreak strains were classified as  
49 DENV2 genotype III (American/Asian genotype). Notably, phylogenetic analysis indicated  
50 that the 2019 outbreak is the result of a novel DENV lineage that was recently introduced to  
51 Brazil from the Caribbean region. Our genetic analysis further indicates that the introduction  
52 and onwards spread of the outbreak lineage (named here DENV2-III BR-4) indicates a new  
53 DENV2 lineage replacement in Brazil. Dating phylogeographic analysis suggests that  
54 DENV2-III BR-4 was introduced to Brazil in or around early 2014, possibly from the  
55 Caribbean region. Our study describes the early detection of a newly introduced and rapidly-  
56 expanding DENV2 virus lineage in Brazil.

57

58 **Key words:** dengue 2, outbreak, genomic surveillance, lineage replacement

## 60 **Author Summary**

61 Dengue is the most important mosquito-borne viral disease of humans. The disease is caused  
62 by the dengue virus (DENV) that is classified within genus *Flavivirus*. DENV infections are  
63 caused by 4 serotypes (DENV 1-4) that are genetically related but antigenically distinct.  
64 Dengue infection results in a variety of symptoms that range from mild fever to dengue  
65 hemorrhagic fever and/or dengue shock syndrome (DHF/DSS). Clinical outcomes are  
66 associated with different types of infection, viral serotypes, genotypes, lineages, and host  
67 genetic factors. As a re-emerging infectious disease, DENV has become a serious threat to  
68 public health in the Americas, and particularly in Brazil, where it was introduced in the 1980s  
69 and became well established due to the country-wide re-infestation of the *Aedes aegypti*  
70 mosquito vector species. During the first six months of 2019, 1,282,183 DENV cases were  
71 reported in the Americas, with Brazil reporting a staggering 1,127,244 (88%) of all dengue  
72 cases in the continent. To date, no information exists on the genetic composition of the  
73 DENV lineage or lineages causing the current epidemic. Here we use portable sequencing to  
74 rapidly generate virus genome data from cases occurring in two different are severely-  
75 affected municipalities in São Paulo state, Brazil. We find that the 2019 dengue outbreak in  
76 Brazil is caused by a newly introduced DENV serotype 2 genotype III (Asian/American) that  
77 seems to be replacing previously-circulating DENV2 lineages. We discuss the potential  
78 implications of our results regarding the current outbreak in the context of previous outbreaks  
79 in the same region.

## 81 **Introduction**

82 Over 400 million people are estimated to be at risk of acquiring dengue virus (DENV, genus  
83 *Flavivirus*, family *Flaviviridae*) [1], a mosquito-borne virus transmitted in tropical and  
84 subtropical areas by competent urban vectors such as the mosquitoes *Aedes aegypti* and  
85 *Aedes albopictus* [2]. DENV is classified into four distinct virus lineages named serotypes 1  
86 to 4 (DENV1-4). Within each DENV serotype there is some degree of genetic variation, and  
87 at least 19 DENV genotypes have now been described [3]. Increasing human mobility has  
88 facilitated the co-circulation of multiple dengue serotypes in the same region [4], a pattern  
89 known as hyperendemicity. In such regions, DENV epidemiological dynamics are complex  
90 and typically characterized by virus genotype replacement every 7-10 years [5-9]. Clade  
91 replacement is typically associated with an increased number of cases and cases with severe  
92 disease. Certain genotypes and lineages seem to be more frequently associated with severe  
93 disease outcomes [8, 10, 11].

94

95 DENV was first detected in Brazil in 1982 [12]. Since then, it has become a serious public  
96 health concern due to its high incidence in the country and association with severe dengue  
97 illnesses [13]. Co-circulation of dengue serotypes has been observed throughout Brazil [14,  
98 15], particularly in highly populated areas of the southeastern region that includes the federal  
99 states of São Paulo, Rio de Janeiro, Minas Gerais and Espírito Santo. Between 1995 and  
100 2015, Brazil reported nearly 8 million DENV cases, which comprises 55% of all cases  
101 reported in the Americas during this period [12]. Over the last thirty years, the southeast  
102 region of Brazil has reported 2225 dengue-related fatal cases, representing 43% of all  
103 dengue-related deaths in the country [13].

104 In the first half of 2019 (1<sup>st</sup> Jan to 30<sup>th</sup> Jun) Brazil has already reported 1,127,244 dengue  
105 cases [12]. Importantly, this number is nearly 8-fold higher than in the previous year and

106 corresponds to 89% of all the dengue cases reported in the Americas over the same period.

107 The number of severe cases (n=710) and dengue-related deaths (n=366) also increased by at

108 least 2.3-fold in comparison with 2018.

109

110 The Southeast region of Brazil has reported 65.7% of all dengue cases identified in the

111 country [16]. São Paulo state is the most highly densely populated state and the main socio-

112 economic hub in Brazil; previous studies suggest the state was an important source location

113 for the spread of DENV4 in the country [17]. Here, we characterise the genetic diversity of

114 circulating DENV in two municipalities of São Paulo state. We generated virus genome

115 sequences from the ongoing outbreak using a well-established portable genomic approach

116 [18, 19]. In an attempt to better understand the origin and dynamics of the 2019 outbreak, we

117 conducted comprehensive genetic analyses to understand the relationship between the current

118 epidemic strains and those that circulated in previous outbreaks in the Americas.

## 120 **Methods**

121 Brazil is organized into 26 federal states and 1 federal district. Sao Paulo state is the most  
122 populous Brazilian state and comprises 615 municipalities. São José do Rio Preto is the 11<sup>th</sup>  
123 most populated municipality (450,657 inhabitants), and Araraquara the 32<sup>nd</sup> most populated  
124 municipality (230,770 inhabitants) in the state ([www.ibge.gov.br](http://www.ibge.gov.br)). In each municipality, the  
125 number of dengue suspected cases is notified by local public health secretaries to the Centro  
126 de Vigilância Epidemiológica "Prof.Alexandre Vranjac" (CVE), part of Sao Paulo's State  
127 Health Secretary. As part of dengue surveillance efforts in São Paulo state, samples are  
128 collected from patients suspected of acute DENV infection and tested for DENV by real-time  
129 quantitative reverse transcription PCR (qRT-PCR) by several research centers and public  
130 health institutions, including Adolfo Lutz Institute. Monthly numbers of dengue cases per  
131 serotype are then aggregated by CVE.

132

133 To assess the genetic diversity of dengue cases circulating in Sao Paulo state, we selected 20  
134 qRT-PCR positive samples DENV serotype 2 from patients in two municipalities, Araraquara  
135 and São José do Rio Preto. The majority of the samples (19 out of 20) was collected between  
136 January and the end of April 2019; however, to investigate whether the same lineage was  
137 circulating before 2019, we also included one sample from São José do Rio Preto collected in  
138 early June 2017. Samples had mean RT-qPCR cycle-threshold values of 19.8 (range: 16.4 -  
139 25). Diagnostic details and symptoms are shown in **Table S1**.

140

141 Residual anonymized clinical diagnostic samples from Araraquara were obtained following  
142 ethical approval by Hospital das Clínicas - University of São Paulo's Institutional Review  
143 Board (CAPPesq) (number 3.156.894). São José do Rio Preto samples were obtained from  
144 virological surveillance routine, within the study approved by University of São José do Rio

145 Preto Institutional Review Board approval #48982/2012. We used residual anonymized  
146 clinical diagnostic samples, with no risk to patients, which were provided for research and  
147 surveillance purposes within the terms of Resolution 510/2016 of CONEP (Comissão  
148 Nacional de Ética em Pesquisa, Ministério da Saúde; National Ethical Committee for  
149 Research, Ministry of Health).

150

151 The 20 qRT-PCR–positive DENV2 samples were subjected to viral genomic amplification at  
152 the Institute of Tropical Medicine, University of São Paulo, Brazil. Genome sequencing was  
153 conducted using the portable nanopore MinION sequencing platform, which has been used  
154 previously in Brazil during outbreaks of Zika virus and yellow fever virus [9-11]. Sequencing  
155 was performed using a multiplex PCR primer scheme designed to amplify the entire coding  
156 region of DENV2 as previously described [12].

157

158 RNA was extracted and reverse-transcribed to cDNA using Superscript IV First-Strand  
159 Synthesis System (Thermo Fisher Scientific, MA, US) and random hexamer priming. Then,  
160 multiplex PCR was performed to generate overlapping amplicons of the whole genome of the  
161 targeted DENV2 strain. DENV2 genome amplification consisted of 35 cycles of PCR  
162 according to the reaction mix and thermocycling described by Quick et al [19]. AmpureXP  
163 purification beads (Beckman Coulter, High Wycombe, UK) were used to clean up PCR  
164 products, which were then quantified by Qubit dsDNA High Sensitivity assay on a Qubit 3.0  
165 instrument (Life Technologies). Sequencing libraries were generated using the Genomic  
166 DNA Sequencing Kit SQK-LSK108 (Oxford Nanopore Technologies), by pooling, in  
167 equimolar proportions, a total of 250 ng of PCR products previously barcoded using the  
168 Native Barcoding Kit (NBD103, Oxford Nanopore Technologies, Oxford, UK). The libraries  
169 were loaded onto an Oxford Nanopore flow cell R9.4 (FLO-MIN106) and sequencing data



170 were collected for 30 hours. The median number of mapped reads was 45,013 reads per  
171 sample, and the generated consensus genomes had a mean coverage of 81% of the genome at  
172 20x minimum sequencing depth. Sequencing statistics for each sample are shown in **Table**  
173 **S1**. Raw and processed data are available on GitHub (<https://github.com/arbospread>).

174

175 To investigate the origins of the newly generated genomes we downloaded all DENV2  
176 nucleotide sequences longer than 1400 nucleotides (nt) from GenBank [16] that had a known  
177 date (year, and month and day when available) and location (country, and city when  
178 available; n=1630 as of 20 June 2019). We aligned these sequences using MAFFT automatic  
179 settings [18] and manually edited them with AliView v1.19 [19]. We subsequently  
180 constructed an initial maximum likelihood phylogeny to help identify the genotypes of strains  
181 that have historically circulated (collected before 2019) and are currently circulating  
182 (collected in 2019) in Brazil. For this genotype assessment, we constructed phylogenies using  
183 FastTree v.2 with gamma-distributed among site rate heterogeneity and a general time  
184 reversible nucleotide substitution model [20]. We observed that all sequences from the  
185 Americas (including the newly generated sequences) grouped together in a well-supported  
186 monophyletic clade. Therefore we next constructed a dataset comprising only sequences  
187 collected in the Americas (n=670). To reduce sampling bias towards a high number of  
188 samples from well-sampled countries, we removed duplicate sequences (same day and  
189 location) from Nicaragua and Peru, yielding a final dataset of 436 genomes (including 66  
190 genomes collected in Brazil between 1990 to 2013). Maximum likelihood phylogenies of the  
191 American DENV2 genomes (n=670 and n=436) were generated using PhyML [20] available  
192 through Seaview v.4.6.1, using gamma-distributed among site rate heterogeneity and a  
193 general time reversible nucleotide substitution model [21]. Root-to-tip divergence and  
194 temporal signal was evaluated using TempEst [21].

195 Georeferenced and time-stamped phylogenies were constructed using a discrete  
196 phylogeographic approach as previously described [19, 22]. In brief, countries were grouped  
197 into four geographic regions consisting of Brazil (n=86), Central America and Mexico  
198 (n=45), South America (n=132) and Caribbean (n=173). Inferred locations at each internal  
199 node and corresponding dated phylogenies trees were estimated using BEAST1.10 [23].  
200 MCMC convergence was inspected using Tracer.v1.7 and summary trees were generated  
201 using TreeAnnotator [23].

203 **Results and Discussion**

204 Epidemiological information on the number of confirmed dengue cases with associated  
205 serotype information shows that all four dengue serotypes co-circulate in Sao Paulo state  
206 (**Figure 1A**). While in 2012 DENV1 (52%, n=373/712) and DENV4 (39%, n=274/712)  
207 predominated, DENV 2 (9%, n=64/712) and DENV3 (0.1%, n=1/712) were also detected.  
208 Since 2014 a notable increase in DENV2 cases is observed, with frequencies increasing  
209 rapidly from 1.03% (n=12/1161) in 2014, to 1.39% (n=23/1650) in 2015, 12.53% (n=53/423)  
210 in 2016, 30.56% (n=52/423) in 2017, 71.5 (n=271/379) in 2018 to 87.5% (n=1539/1758) in  
211 the first semester of 2019 (**Figure 1A**).

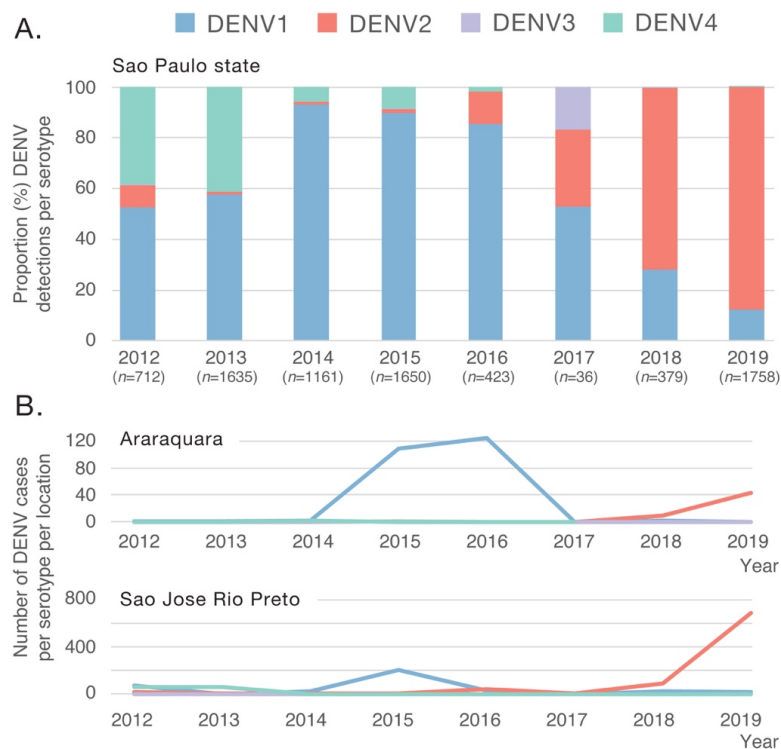

212

213 **Figure 1.** Annual number of DENV cases by serotype reported to the Centro Vigilância  
214 Epidemiológica (CVE), Sao Paulo state, Brazil, between January 2012 and June 2019. A.

215 Proportion (percentage) of dengue cases by serotype reported in Sao Paulo state (total

216 n=7754). B. Number of dengue cases by serotype in Araraquara (total n=294) and in São José

217 do Rio Preto (total n=1347).

218 We next report genomic epidemiological findings from our surveillance of two municipalities  
219 in the São Paulo state, Araraquara (ARA) and São José do Rio Preto (SJRP), between early  
220 June 2017 and the end of April 2019. In Araraquara, a total of 96% (n=52/54) dengue cases  
221 notified to CVE were caused by DENV2 between 2017 and June 2019; in São José do Rio,  
222 Preto, during the same period, 95% (n=779/821) were caused by this serotype (**Figure 1B**).  
223 From each location, ten RT-qPCR positive samples (mean cycle threshold: 19.8, range: 16.4  
224 to 25) were randomly selected for complete genome sequencing using a previously developed  
225 amplicon-based approach for on-site sequencing using the minION platform [24, 25].

226

227 All sequenced samples were classified as DENV2 using an automated phylogenetic-based  
228 serotyping tool [3]. To investigate the genotypic diversity and the origins of the ongoing  
229 DENV2 outbreak in Brazil, we performed phylogenetic analysis of DENV2 using all publicly  
230 available complete or partial DENV2 genome sequences (n= 1,630 as of 21 June 2019).

231

232 DENV2 is classified into six genotypes, named I-VI [3]. To date, 3 genetic lineages of  
233 DENV2 genotype III (DENV2-III) have been reported in Brazil on the basis of phylogenetic  
234 analysis of the relationships of partial and complete genomes of circulating strains. These  
235 three circulating lineages have been named as lineages 1-3 [5] or BR1-BR3 [26]. Our  
236 maximum likelihood (ML) phylogenetic analysis shows a separate introduction of DENV2,  
237 hereafter named DENV2-III BR-4 (**Figure 2A**).

238

239 Our ML phylogenetic analysis further shows that virus genomes recovered from the 2019  
240 cases all belong to genotype III (also known as American/Asian genotype). Notably, our  
241 analysis strongly supports (approximate likelihood ratio test = 1.00) the clustering of the  
242 2019 DENV2 cases from Brazil (18 of the 19 sequences collected in 2019) into a single

243 monophyletic group (named here as DENV2-III BR-4), which is the result of a new and  
244 recent introduction of DENV2-III from outside of Brazil (**Figure 2A**). In addition, two  
245 sequences from São José do Rio Preto, one sampled in June 2017 (ID: 126) and another in  
246 January 2019 (ID: 140) grouped with the isolates from a previous clade circulating since  
247 2006 in the Southeast Region (BR-3).

248

249 To investigate in more detail the origins of the new DENV2-III BR-4 circulating in Brazil in  
250 2019, we conducted a statistical phylogeographic analysis of 436 DENV2 genome sequences  
251 representing DENV2 genotypes circulating in the Americas. Our analysis reveals that the  
252 DENV2-III BR-4 lineage was introduced in or around 2014 (95% Bayesian credible interval:  
253 2012 to 2015) (**Figure 2B**). From then onwards, the proportion of DENV2 cases in São Paulo  
254 state increased (**Figure 1A**). Estimation of the ancestral location of this lineage reveals that it  
255 likely originated in the Caribbean region (posterior support = 1.00). However, we note that  
256 the new lineage could have also been introduced from countries with tropical climates in  
257 South America (e.g. French Guiana or Suriname) from where no recent virus genomic data  
258 has been made available. Molecular clock analyses have shown that novel DENV lineages  
259 have been introduced in Brazil every 7 to 10 years, after which they are replaced by a novel  
260 lineage introduced from other locations. For example, DENV2-III BR-1 was introduced in  
261 1990, DENV2-III BR-2 in 1998, DENV2-III BR-3 in 2005 [5]. Given that the former lineage  
262 replacement in Brazil resulted from a strain introduced around 2005, our dating estimate for  
263 the introduction of DENV2-III BR-4 and the noticeable increase in number of DENV2 cases  
264 in Sao Paulo state are indicative of a new DENV2 lineage replacement in Brazil.

265

266 Our data reveals that two distinct virus lineages (DENV2-III BR-3 and DENV2-III BR-4) are  
267 co-circulating in a single location (São José do Rio Preto) (**Figure 2**). Although we are

268 limited by the small sample size of the data analysed here, it is remarkable that the frequency  
269 of DENV2-III 2019 strains belonging to BR-3 is 5.3% (n=1/19) and for BR-4 is 94.7%  
270 (n=18/19). The upsurge in the number of dengue and dengue severe cases observed in São  
271 Paulo state, combined with the simultaneous detection of these two lineages and the  
272 increased frequency of BR-4 suggests that we are capturing a lineage replacement in real-  
273 time.  
274

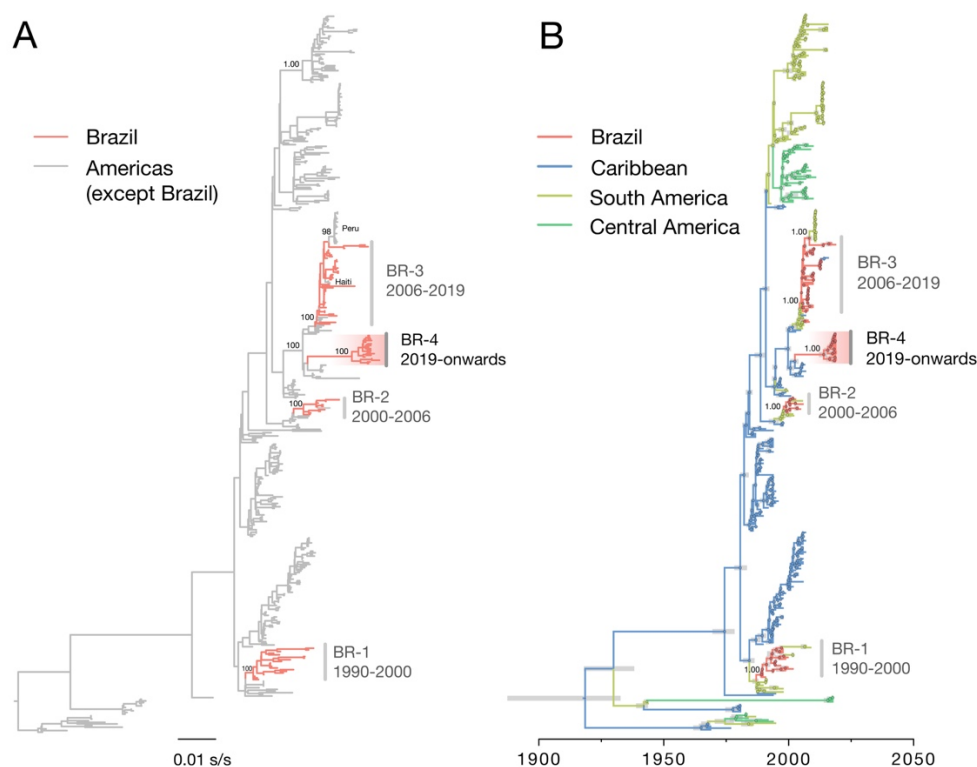

275

276

277 **Figure 2. Evolutionary history of DENV2 in Brazil.** Maximum likelihood phylogeny (A)  
278 and dated phylogeographic tree (B) of DENV serotype 2 ( $n=436$ ) in the Americas. Tips (and  
279 nodes leading to) Brazilian strains are shown in red. New clade comprising isolates from  
280 2019 collected in Araraquara and São José Rio Preto (São Paulo state) are highlighted with a  
281 red gradient. In panel B, 95% Bayesian credible intervals for node ages are shown for nodes  
282 with posterior support above 0.95.

283 The surveillance lag between the detection and estimated date of introduction of the DENV2-  
284 III BR-4 could result from a lack of genomic surveillance of dengue in a period when Brazil  
285 was hit by explosive epidemics of Zika, chikungunya and yellow fever viruses [27, 28]. This  
286 highlights the need of improved longitudinal surveillance using, for instance, sequence-  
287 independent approaches for arbovirus detection. Such approaches will be particularly critical  
288 in geographic regions with year-round DENV transmission in *Aedes* spp. mosquitoes, such as  
289 locations with tropical and subtropical climates [2]. Integration of routine serological,  
290 molecular, and genomic data along with improved digital surveillance [29], will help to  
291 anticipate the arrival and establishment of new virus lineages and other pathogens in the  
292 Americas.

294 **Data availability**

295 XML files and datasets analysed in this study are available in the GitHub repository  
296 (<https://github.com/arbospread/DENV2>). New sequences have been deposited in GenBank  
297 under accession numbers XXXXX.

298

299 **Acknowledgments**

300 The research was supported by the FAPESP-MRC grant (CADDE, FAPESP 2018/14389-0),  
301 a Wellcome Trust and Royal Society Sir Henry Dale Fellowship (grant 204311/Z/16/Z), and  
302 by a CNPq # 400354/2016-0 and FAPESP # 2016/01735-2, and by the Oxford Martin  
303 School. This work was supported by Decit/SCTIE/MoH and CNPq (440685/2016-8 and  
304 440856/2016-7); by CAPES (88887.130716/2016-00, 88881.130825/2016-00 and  
305 88887.130823/2016-00); by EU's Horizon 2020 Programme through ZIKAlliance (PRES-  
306 005-FEX-17-4-2-33). MLN is supported by FAPESP (Grant # 13/21719-3). ACBT and KRD  
307 receive FAPESP Scholarships (Grants #15/12295-0 and 15/14313-6, respectively). MLN and  
308 ECS are CNPq Research Fellows (PQ).



## 310 **References**

- 311 1. Bhatt S, Gething PW, Brady OJ, Messina JP, Farlow AW, Moyes CL, et al. The  
312 global distribution and burden of dengue. *Nature*. 2013;496(7446):504-7. Epub 2013/04/09.  
313 doi: 10.1038/nature12060. PubMed PMID: 23563266; PubMed Central PMCID:  
314 PMCPMC3651993.
- 315 2. Kraemer MUG, Reiner RC, Jr., Brady OJ, Messina JP, Gilbert M, Pigott DM, et al.  
316 Past and future spread of the arbovirus vectors *Aedes aegypti* and *Aedes albopictus*. *Nat*  
317 *Microbiol*. 2019;4(5):854-63. Epub 2019/03/06. doi: 10.1038/s41564-019-0376-y. PubMed  
318 PMID: 30833735; PubMed Central PMCID: PMCPMC6522366.
- 319 3. Fonseca V, Libin PJK, Theys K, Faria NR, Nunes MRT, Restovic MI, et al. A  
320 computational method for the identification of Dengue, Zika and Chikungunya virus species  
321 and genotypes. *PLoS Negl Trop Dis*. 2019;13(5):e0007231. Epub 2019/05/09. doi:  
322 10.1371/journal.pntd.0007231. PubMed PMID: 31067235; PubMed Central PMCID:  
323 PMCPMC6527240.
- 324 4. Tian H, Sun Z, Faria NR, Yang J, Cazelles B, Huang S, et al. Increasing airline travel  
325 may facilitate co-circulation of multiple dengue virus serotypes in Asia. *PLoS Negl Trop Dis*.  
326 2017;11(8):e0005694. Epub 2017/08/05. doi: 10.1371/journal.pntd.0005694. PubMed PMID:  
327 28771468; PubMed Central PMCID: PMCPMC5542384.
- 328 5. Nunes MR, Palacios G, Faria NR, Sousa EC, Jr., Pantoja JA, Rodrigues SG, et al. Air  
329 travel is associated with intracontinental spread of dengue virus serotypes 1-3 in Brazil. *PLoS*  
330 *Negl Trop Dis*. 2014;8(4):e2769. Epub 2014/04/20. doi: 10.1371/journal.pntd.0002769.  
331 PubMed PMID: 24743730; PubMed Central PMCID: PMCPMC3990485.
- 332 6. de Bruycker-Nogueira F, Mir D, Dos Santos FB, Bello G. Evolutionary history and  
333 spatiotemporal dynamics of DENV-1 genotype V in the Americas. *Infection, genetics and*  
334 *evolution : journal of molecular epidemiology and evolutionary genetics in infectious*

- 335 diseases. 2016;45:454-60. Epub 2016/10/23. doi: 10.1016/j.meegid.2016.09.025. PubMed  
336 PMID: 27713055.
- 337 7. Carneiro AR, Cruz AC, Vallinoto M, Melo Dde V, Ramos RT, Medeiros DB, et al.  
338 Molecular characterisation of dengue virus type 1 reveals lineage replacement during  
339 circulation in Brazilian territory. *Memorias do Instituto Oswaldo Cruz*. 2012;107(6):805-12.  
340 Epub 2012/09/20. doi: 10.1590/s0074-02762012000600016. PubMed PMID: 22990972.
- 341 8. Drumond BP, Mondini A, Schmidt DJ, Bosch I, Nogueira ML. Population dynamics  
342 of DENV-1 genotype V in Brazil is characterized by co-circulation and strain/lineage  
343 replacement. *Archives of virology*. 2012;157(11):2061-73. Epub 2012/07/11. doi:  
344 10.1007/s00705-012-1393-9. PubMed PMID: 22777179.
- 345 9. Mir D, Romero H, Fagundes de Carvalho LM, Bello G. Spatiotemporal dynamics of  
346 DENV-2 Asian-American genotype lineages in the Americas. *PloS one*. 2014;9(6):e98519.  
347 Epub 2014/06/05. doi: 10.1371/journal.pone.0098519. PubMed PMID: 24897118; PubMed  
348 Central PMCID: PMC4045713.
- 349 10. Kanakaratne N, Wahala WM, Messer WB, Tissera HA, Shahani A, Abeysinghe N, et  
350 al. Severe dengue epidemics in Sri Lanka, 2003-2006. *Emerging infectious diseases*.  
351 2009;15(2):192-9. Epub 2009/02/06. doi: 10.3201/eid1502.080926. PubMed PMID:  
352 19193262; PubMed Central PMCID: PMC2662655.
- 353 11. Watts DM, Porter KR, Putvatana P, Vasquez B, Calampa C, Hayes CG, et al. Failure  
354 of secondary infection with American genotype dengue 2 to cause dengue haemorrhagic  
355 fever. *Lancet*. 1999;354(9188):1431-4. Epub 1999/10/30. doi: 10.1016/S0140-  
356 6736(99)04015-5. PubMed PMID: 10543670.
- 357 12. PAHO/WHO. Epidemiological Update Yellow Fever  
358 [https://www.paho.org/hq/index.php?option=com\\_docman&view=download&category\\_slug=](https://www.paho.org/hq/index.php?option=com_docman&view=download&category_slug=)

- 359 [yellow-fever-2194&alias=47954-6-march-2019-yellow-fever-epidemiological-](#)  
360 [update&Itemid=270&lang=en](#) 6 Mar 2019. 2019.
- 361 13. Nunes PCG, Daumas RP, Sanchez-Arcila JC, Nogueira RMR, Horta MAP, Dos  
362 Santos FB. 30 years of fatal dengue cases in Brazil: a review. BMC public health.  
363 2019;19(1):329. Epub 2019/03/23. doi: 10.1186/s12889-019-6641-4. PubMed PMID:  
364 30898104; PubMed Central PMCID: PMC6429821.
- 365 14. Villabona-Arenas CJ, de Oliveira JL, Capra Cde S, Balarini K, Loureiro M, Fonseca  
366 CR, et al. Detection of four dengue serotypes suggests rise in hyperendemicity in urban  
367 centers of Brazil. PLoS Negl Trop Dis. 2014;8(2):e2620. Epub 2014/03/04. doi:  
368 10.1371/journal.pntd.0002620. PubMed PMID: 24587454; PubMed Central PMCID:  
369 PMC3937275.
- 370 15. Rodriguez-Barraquer I, Cordeiro MT, Braga C, de Souza WV, Marques ET,  
371 Cummings DA. From re-emergence to hyperendemicity: the natural history of the dengue  
372 epidemic in Brazil. PLoS Negl Trop Dis. 2011;5(1):e935. Epub 2011/01/20. doi:  
373 10.1371/journal.pntd.0000935. PubMed PMID: 21245922; PubMed Central PMCID:  
374 PMC3014978.
- 375 16. Saúde SdVneSdMrd. Monitoramento dos casos de arboviroses urbanas transmitidas  
376 pelo Aedes (dengue, chikungunya e Zika) até a Semana Epidemiológica 12 de 2019 e  
377 Levantamento Rápido de Índices para Aedes aegypti (LIRAA)  
378 ([http://portalarquivos2.saude.gov.br/images/pdf/2019/abril/30/2019-013-Monitoramento-dos-](http://portalarquivos2.saude.gov.br/images/pdf/2019/abril/30/2019-013-Monitoramento-dos-casos-de-arboviroses-urbanas-transmitidas-pelo-Aedes-publicacao.pdf)  
379 [casos-de-arboviroses-urbanas-transmitidas-pelo-Aedes-publicacao.pdf](#)). Brasilia: 2019.
- 380 17. Ortiz-Baez AS, Cunha MDP, Vedovello D, Colombo TE, Nogueira ML, Villabona-  
381 Arenas CJ, et al. Origin, tempo, and mode of the spread of DENV-4 Genotype IIB across the  
382 state of Sao Paulo, Brazil during the 2012-2013 outbreak. Memorias do Instituto Oswaldo

- 383 Cruz. 2019;114:e180251. Epub 2019/01/10. doi: 10.1590/0074-02760180251. PubMed  
384 PMID: 30624458; PubMed Central PMCID: PMC6333047.
- 385 18. Faria NR, Kraemer MUG, Hill SC, Goes de Jesus J, Aguiar RS, Iani FCM, et al.  
386 Genomic and epidemiological monitoring of yellow fever virus transmission potential.  
387 Science. 2018;361(6405):894-9. Epub 2018/08/25. doi: 10.1126/science.aat7115. PubMed  
388 PMID: 30139911.
- 389 19. Faria NR, Quick J, Claro IM, Theze J, de Jesus JG, Giovanetti M, et al. Establishment  
390 and cryptic transmission of Zika virus in Brazil and the Americas. Nature.  
391 2017;546(7658):406-10. Epub 2017/05/26. doi: 10.1038/nature22401. PubMed PMID:  
392 28538727.
- 393 20. Price MN, Dehal PS, Arkin AP. FastTree 2--approximately maximum-likelihood trees  
394 for large alignments. PloS one. 2010;5(3):e9490. Epub 2010/03/13. doi:  
395 10.1371/journal.pone.0009490. PubMed PMID: 20224823; PubMed Central PMCID:  
396 PMC2835736.
- 397 21. Rambaut A, Lam, T. T., Fagundes de Carvalho, L., Pybus, O. G. Exploring the  
398 temporal structure of heterochronous sequences using TempEst (formerly Path-O-Gen).  
399 Virus Evolution. 2016;2(vew007).
- 400 22. Lemey P, Rambaut A, Drummond AJ, Suchard MA. Bayesian phylogeography finds  
401 its roots. PLoS computational biology. 2009;5(9):e1000520. doi:  
402 10.1371/journal.pcbi.1000520. PubMed PMID: 19779555; PubMed Central PMCID:  
403 PMC2740835.
- 404 23. Suchard MA, Lemey P, Baele G, Ayres DL, Drummond AJ, Rambaut A. Bayesian  
405 phylogenetic and phylodynamic data integration using BEAST 1.10. Virus Evol.  
406 2018;4(1):vey016. Epub 2018/06/27. doi: 10.1093/ve/vey016. PubMed PMID: 29942656;  
407 PubMed Central PMCID: PMC6007674.

- 408 24. Hill SC, Neto de Vasconcelos J, Granja BG, Theze J, Jandondo D, Neto Z, et al. Early  
409 Genomic Detection of Cosmopolitan Genotype of Dengue Virus Serotype 2, Angola, 2018.  
410 Emerging infectious diseases. 2019;25(4):784-7. Epub 2019/03/19. doi:  
411 10.3201/eid2504.180958. PubMed PMID: 30882320; PubMed Central PMCID:  
412 PMCPMC6433006.
- 413 25. Quick J, Grubaugh ND, Pullan ST, Claro IM, Smith AD, Gangavarapu K, et al.  
414 Multiplex PCR method for MinION and Illumina sequencing of Zika and other virus  
415 genomes directly from clinical samples. Nat Protoc. 2017;12(6):1261-76. Epub 2017/05/26.  
416 doi: 10.1038/nprot.2017.066. PubMed PMID: 28538739.
- 417 26. Drumond BP, Mondini A, Schmidt DJ, de Moraes Bronzoni RV, Bosch I, Nogueira  
418 ML. Circulation of different lineages of Dengue virus 2, genotype American/Asian in Brazil:  
419 dynamics and molecular and phylogenetic characterization. PloS one. 2013;8(3):e59422.  
420 Epub 2013/03/28. doi: 10.1371/journal.pone.0059422. PubMed PMID: 23533624; PubMed  
421 Central PMCID: PMCPMC3606110.
- 422 27. Grubaugh ND, Faria NR, Andersen KG, Pybus OG. Genomic Insights into Zika Virus  
423 Emergence and Spread. Cell. 2018;172(6):1160-2. Epub 2018/03/10. doi:  
424 10.1016/j.cell.2018.02.027. PubMed PMID: 29522736.
- 425 28. Romano CM, de Matos AM, Araujo ES, Villas-Boas LS, da Silva WC, Oliveira OM,  
426 et al. Characterization of Dengue virus type 2: new insights on the 2010 Brazilian epidemic.  
427 PloS one. 2010;5(7):e11811. Epub 2010/08/03. doi: 10.1371/journal.pone.0011811. PubMed  
428 PMID: 20676363; PubMed Central PMCID: PMCPMC2911371.
- 429 29. Naveca FG, Claro I, Giovanetti M, de Jesus JG, Xavier J, Iani FCM, et al. Genomic,  
430 epidemiological and digital surveillance of Chikungunya virus in the Brazilian Amazon.  
431 PLoS Negl Trop Dis. 2019;13(3):e0007065. Epub 2019/03/08. doi:

432 10.1371/journal.pntd.0007065. PubMed PMID: 30845267; PubMed Central PMCID:

433 PMC6424459.

434

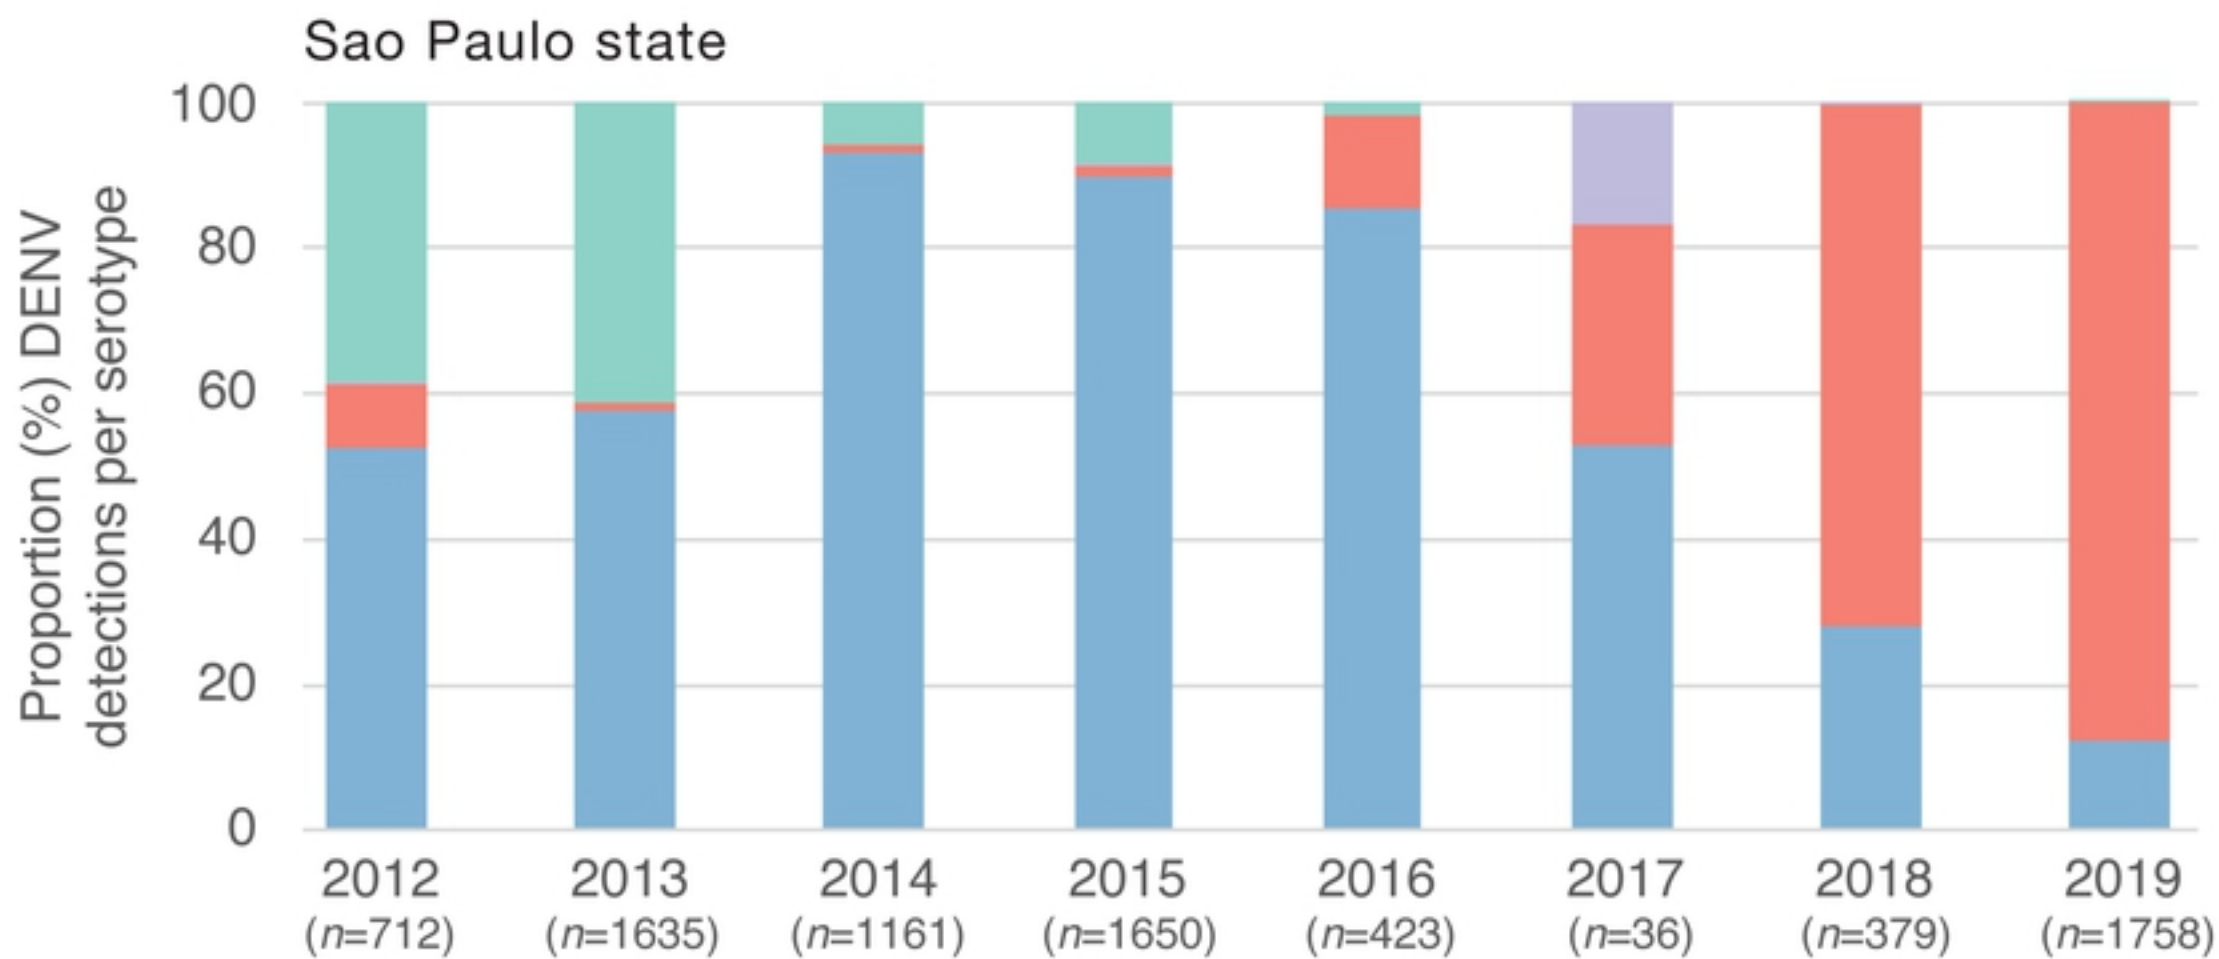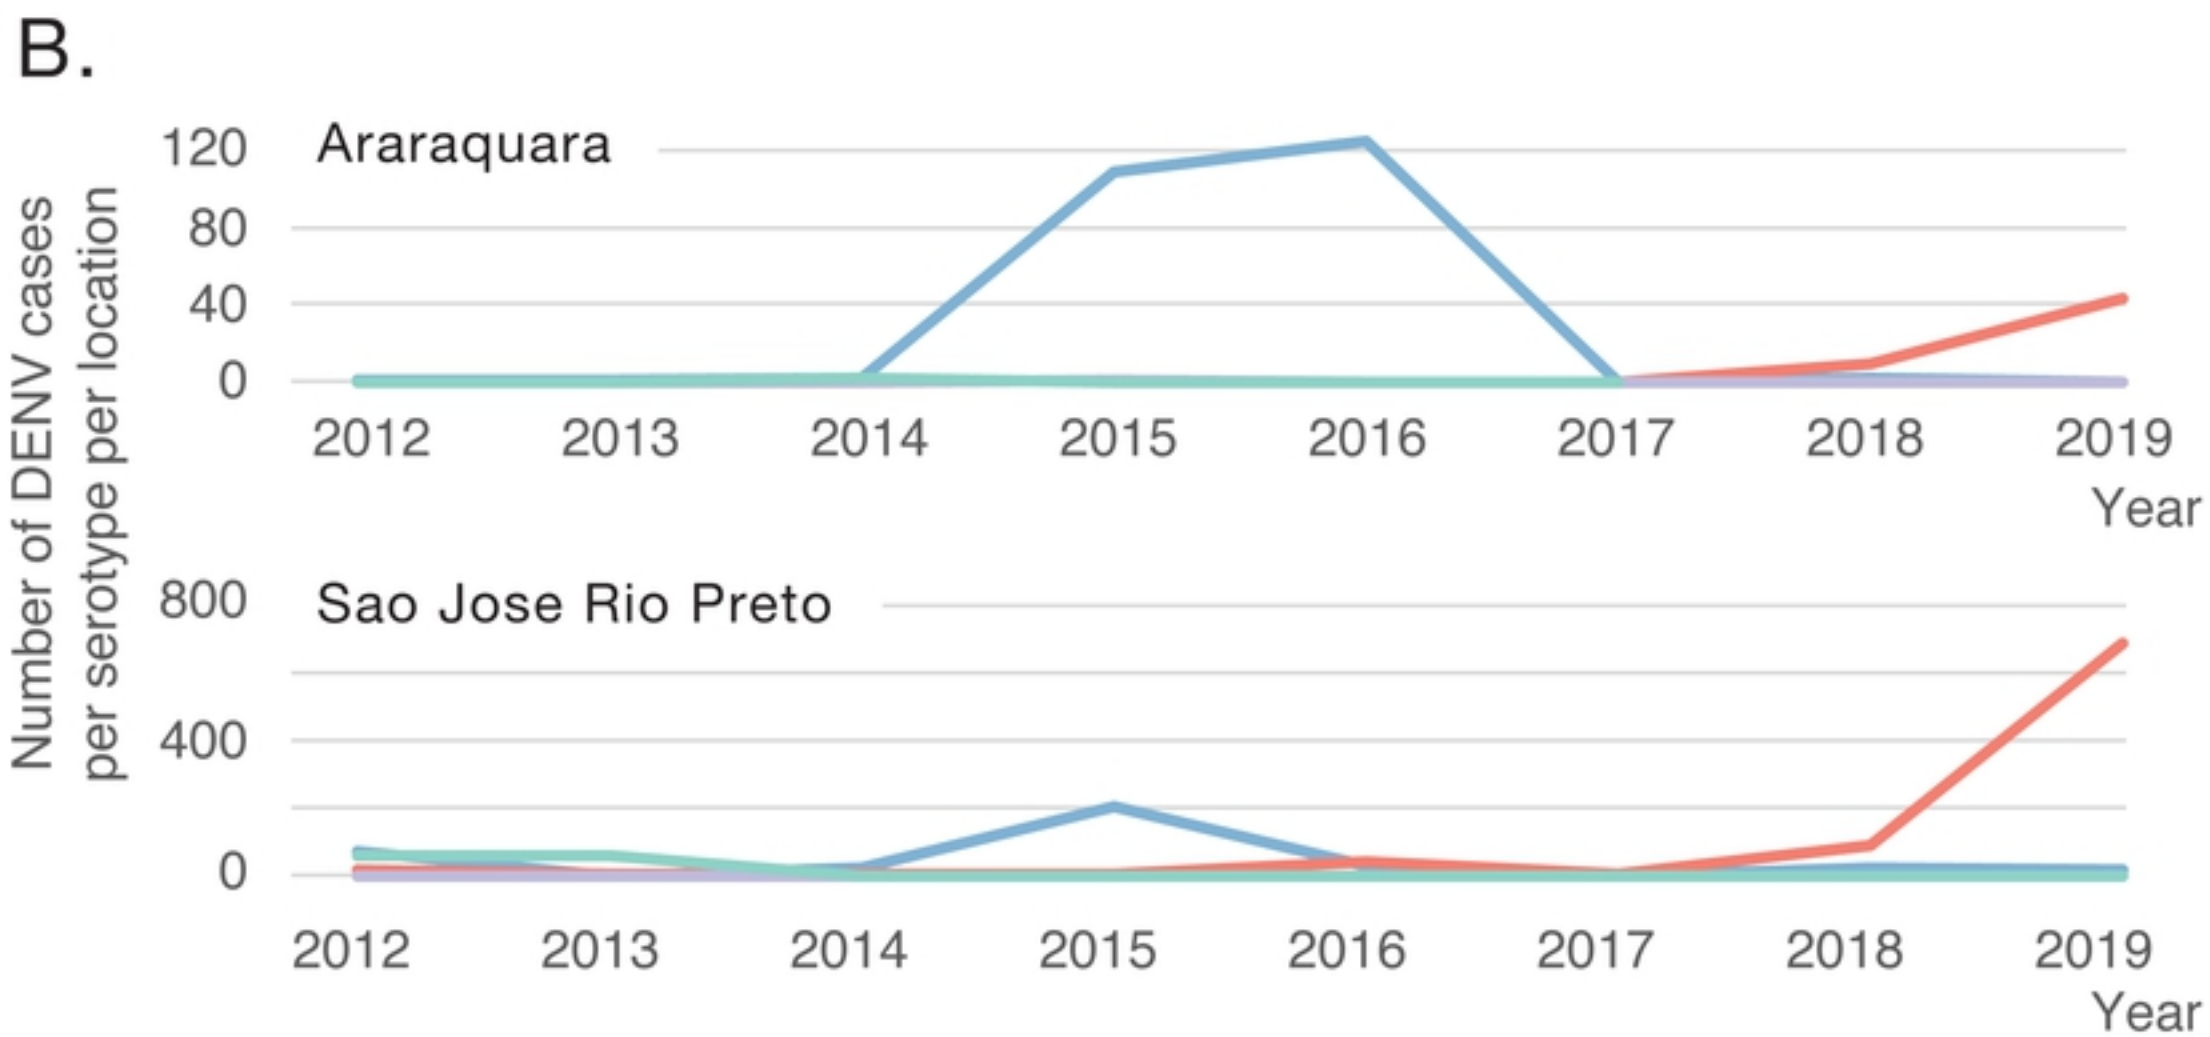

Figure 1

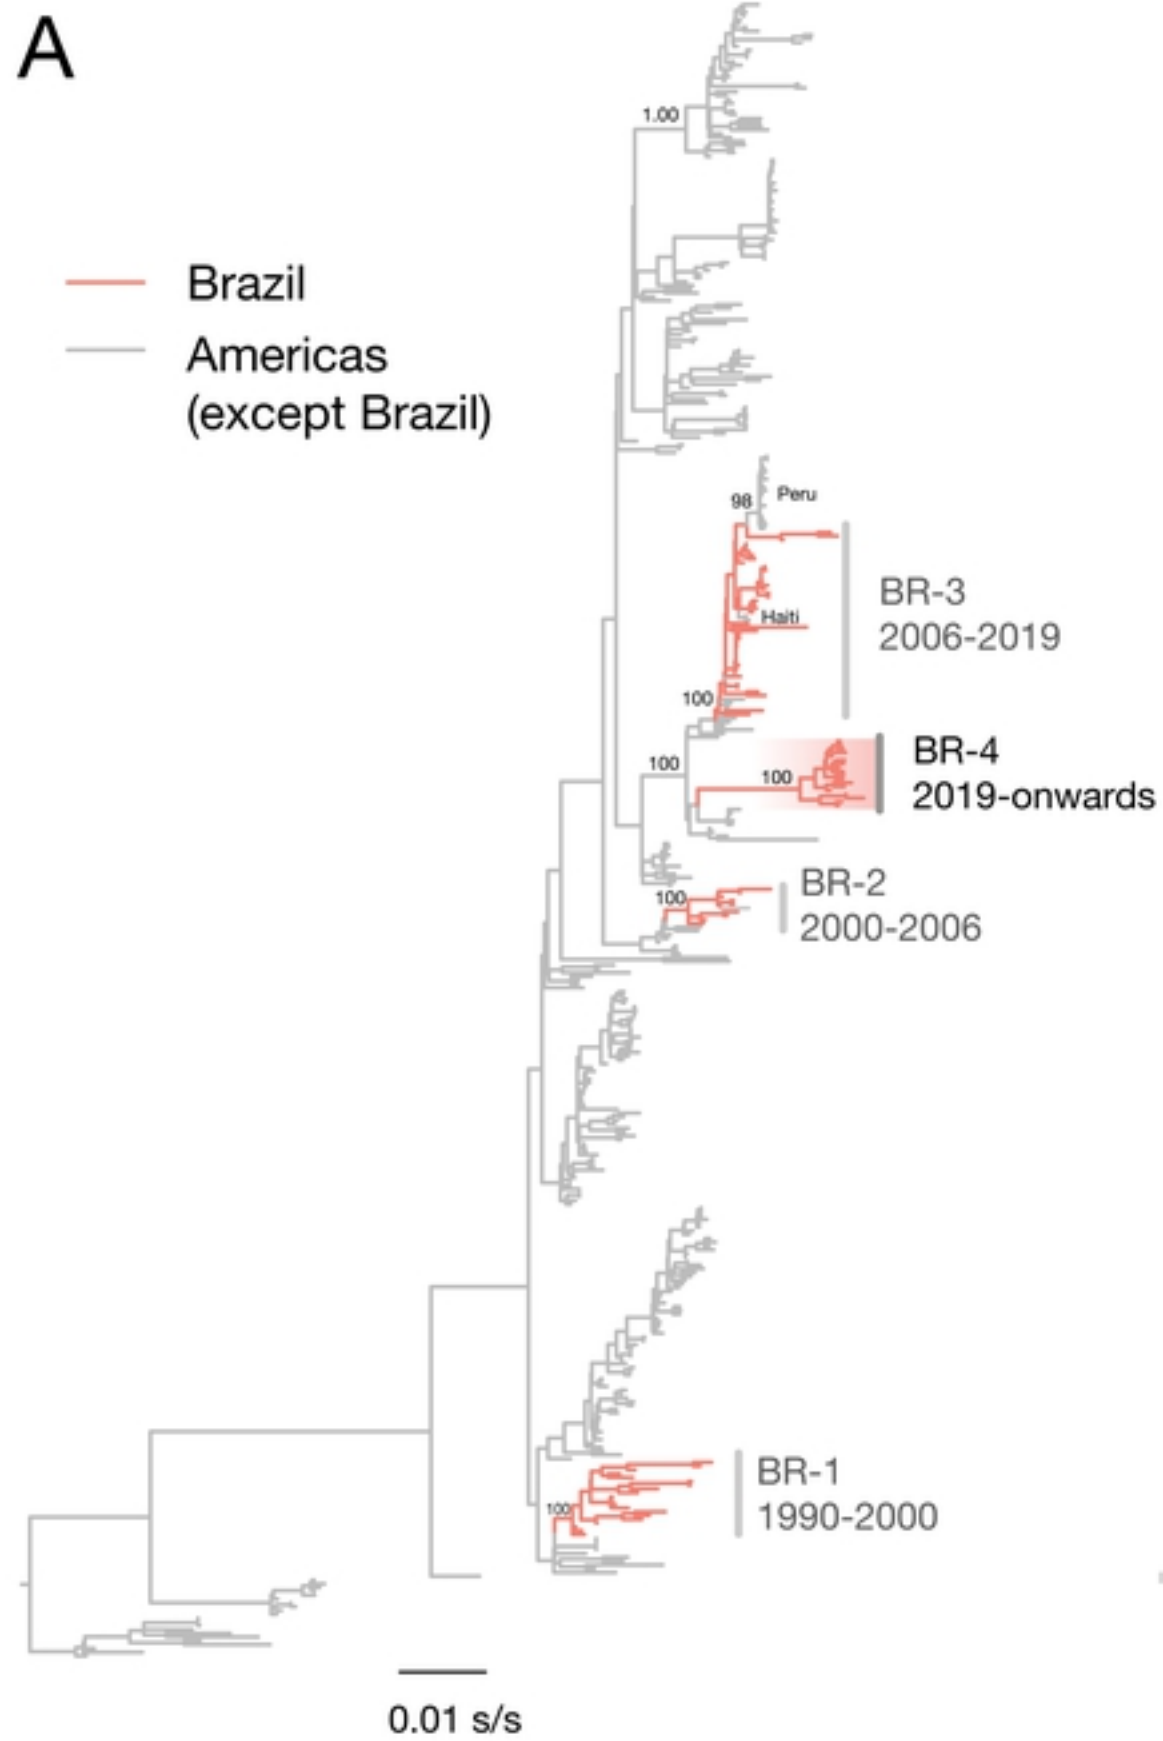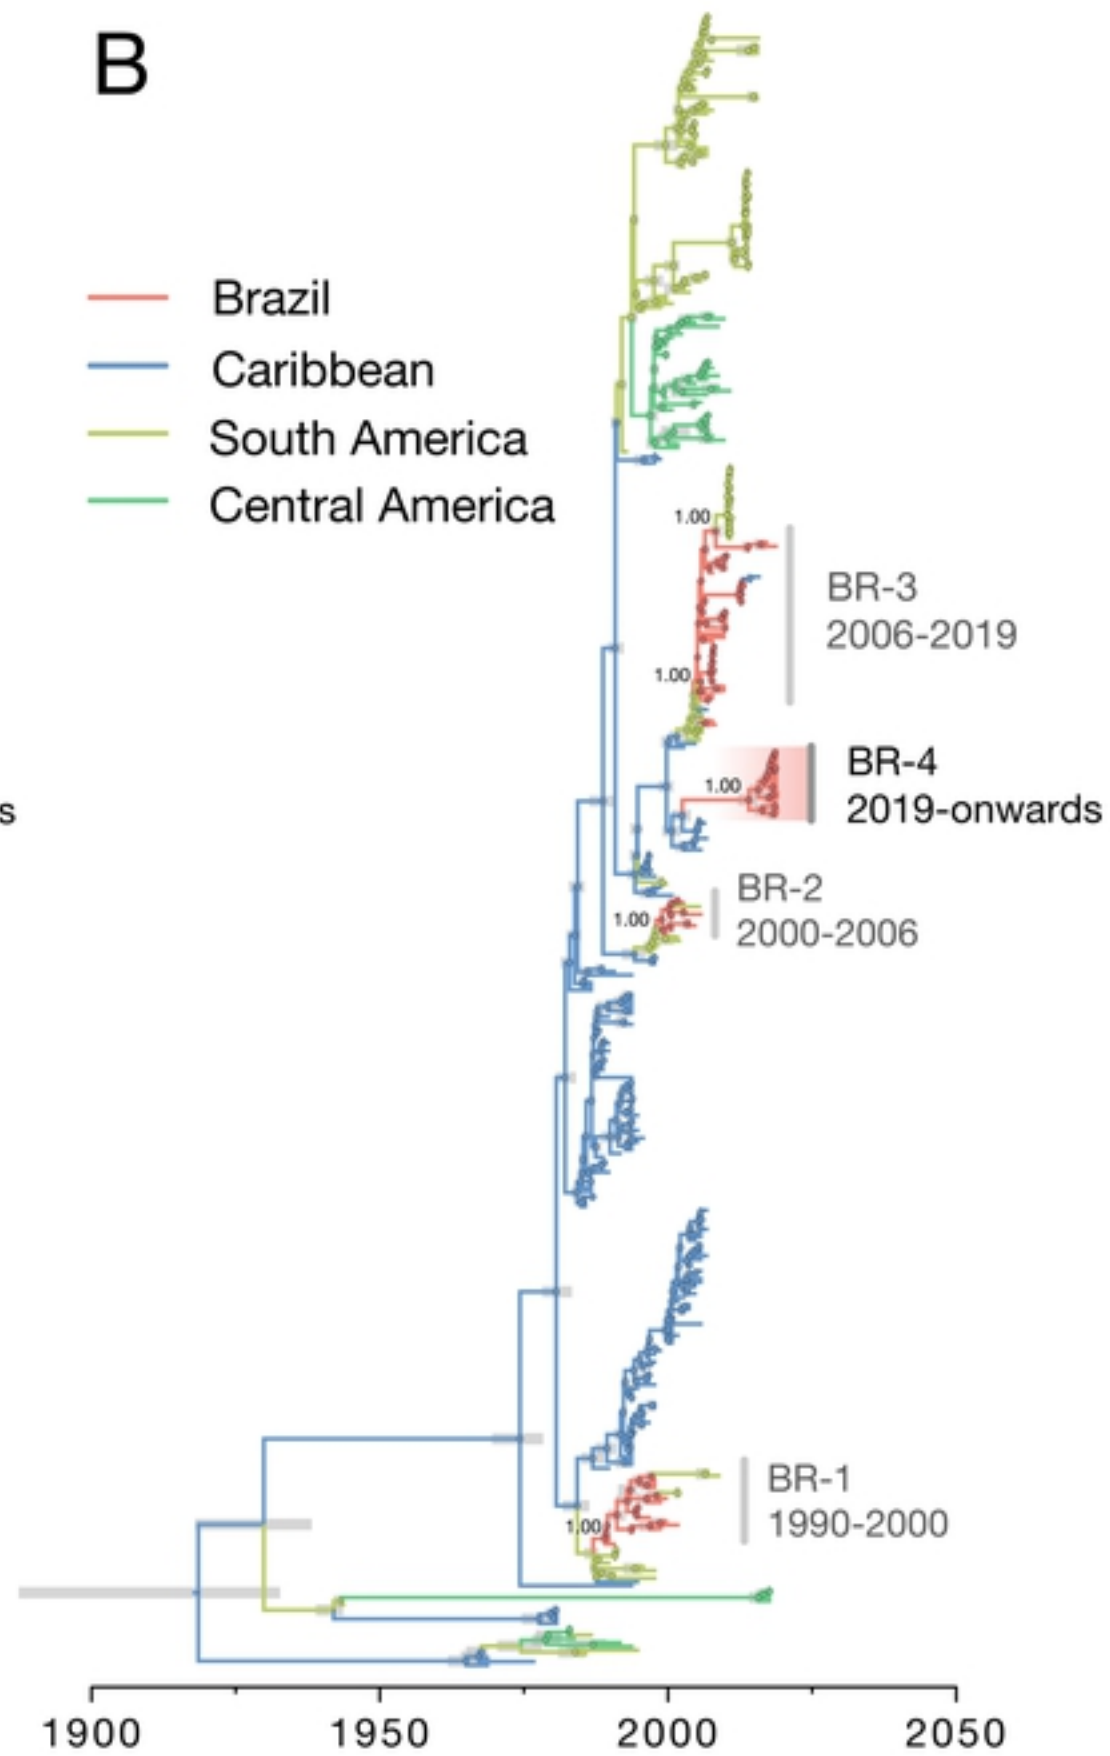

Figure 2
